# Supplementary material for: Bmi1 Drives Stem-Like Properties and is Associated with Migration, Invasion, and Poor Prognosis in Tongue Squamous Cell Carcinoma
Source: PubMed Central journal article supplement — Int J Biol Sci. 2015 Jan 1;11(1):1–10. doi: 10.7150/ijbs.10405 (PMC4278249; doi:10.7150/ijbs.10405), 2015-01-01
Supplement: ijbsv11p0001s1.pdf [file ijbsv11p0001s1.pdf]

## Supplemental table and figure

**Table S1: Clinical characterization of the clinical samples for IHC analysis.**

|                             |                | TSCC (n=77) | TSCC with<br>follow-up (n=52) | Leukoplakia<br>(n=22) | Normal<br>(n=12) |
|-----------------------------|----------------|-------------|-------------------------------|-----------------------|------------------|
| <b>Age</b>                  | Mean(y, Range) | 49.5(21-77) | 46.2(21-73)                   | 51 (34-82)            | 49.9(33-71)      |
| <b>Gender</b>               | Male: n (%)    | 42(54.5%)   | 24(46.2%)                     | 13(59.1%)             | 8(66.7%)         |
|                             | Female: n (%)  | 35(45.5%)   | 28(53.8%)                     | 9(40.9%)              | 4(33.3%)         |
| <b>Pathological T Stage</b> | pT 4: n (%)    | 4(5.2%)     | 8(15.4%)                      |                       |                  |
|                             | pT 3: n (%)    | 12(15.6%)   | 8(15.4%)                      |                       |                  |
| <b>T Stage</b>              | pT 2: n (%)    | 36(46.7%)   | 26(50.0%)                     |                       |                  |
|                             | pT 1: n (%)    | 23(29.9%)   | 10(19.2%)                     |                       |                  |
| <b>Pathological N Stage</b> | pN+ : n (%)    | 31(40.3%)   | 24(46.2%)                     |                       |                  |
| <b>N Stage</b>              | pN- : n (%)    | 46(59.7%)   | 28(53.8%)                     |                       |                  |
| <b>Clinical stage</b>       | III-IV: n(%)   | 39(50.6%)   | 30(57.7%)                     |                       |                  |
|                             | I-II: n(%)     | 38(49.4%)   | 22(42.3%)                     |                       |                  |
| <b>Grade</b>                | Well: n(%)     | 46(59.7%)   | 38(73.1%)                     |                       |                  |
|                             | Moderate: n(%) | 19(24.7%)   | 10(19.2%)                     |                       |                  |
| <b>Grade</b>                | poor: n(%)     | 12(15.6%)   | 4(7.7%)                       |                       |                  |
|                             | light: n(%)    |             |                               | 11(50.0%)             |                  |
|                             | Moderate: n(%) |             |                               | 7(31.8%)              |                  |
|                             | severe: n(%)   |             |                               | 4(18.2%)              |                  |

**Table S2: siRNA sequences used for transfection.**

| Gene No. |           | sense (5'-3')         |
|----------|-----------|-----------------------|
| Bmi1     | NM_005180 | CCAGACCACUACUGAAUAUTT |
| C-myc    | NM_002467 | ACAGCAGCUAUCUGCAAGATT |
| Control  |           | UUCUCCGAACGUGUCACGUTT |

**Table S3: The actual P values for the comparison of Bmi1 staining intensities.**

|                                           | normal<br>tongue tissue | LP    | L LP  | M-S LP | TSCC  | Pathological<br>N Stage(pN <sup>+</sup> ) | Clinical<br>stage(III+IV) |
|-------------------------------------------|-------------------------|-------|-------|--------|-------|-------------------------------------------|---------------------------|
| normal                                    |                         | 0.014 | 0.042 | 0.002  | 0.036 |                                           |                           |
| tongue tissue                             |                         |       |       |        |       |                                           |                           |
| LP                                        |                         |       |       |        | 0.281 |                                           |                           |
| L LP                                      |                         |       |       | 0.037  | 0.610 |                                           |                           |
| M-S LP                                    |                         |       |       |        | 0.057 |                                           |                           |
| TSCC                                      |                         |       |       |        |       |                                           |                           |
| Pathological<br>N Stage(pN <sup>+</sup> ) |                         |       |       |        |       | 0.006                                     |                           |
| Clinical stage<br>(I+II)                  |                         |       |       |        |       |                                           | 0.004                     |

\*: L LP: light LP, M-S LP: moderate and severe LP, TSCC: tongue squamous cell carcinoma, N:

lymph node.

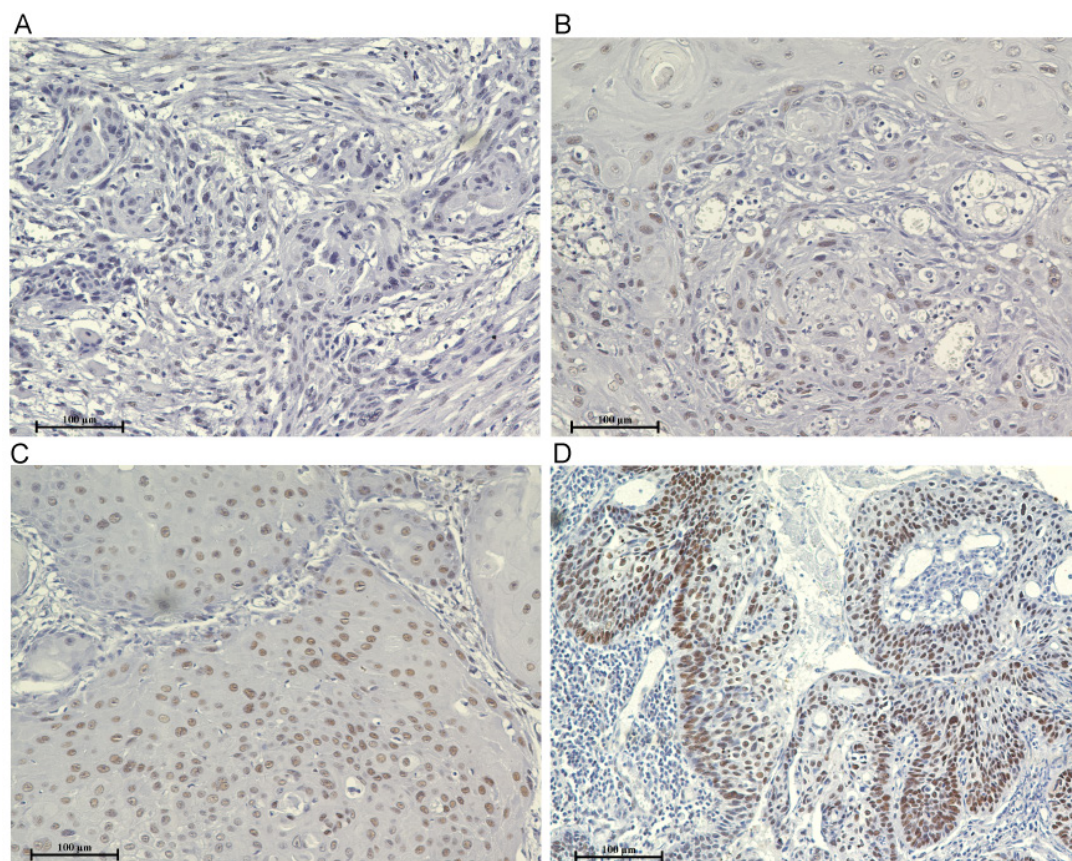

**Figure S1: The representative images of Bmi1 staining intensities for each score (0-3).**

Immunohistochemistry analyses for Bmi1 were performed as described in Material and Methods. **A:** score 0, **B:** score 1, **C:** score 2, **D:** score 3. (Scale bar: 100 µm).

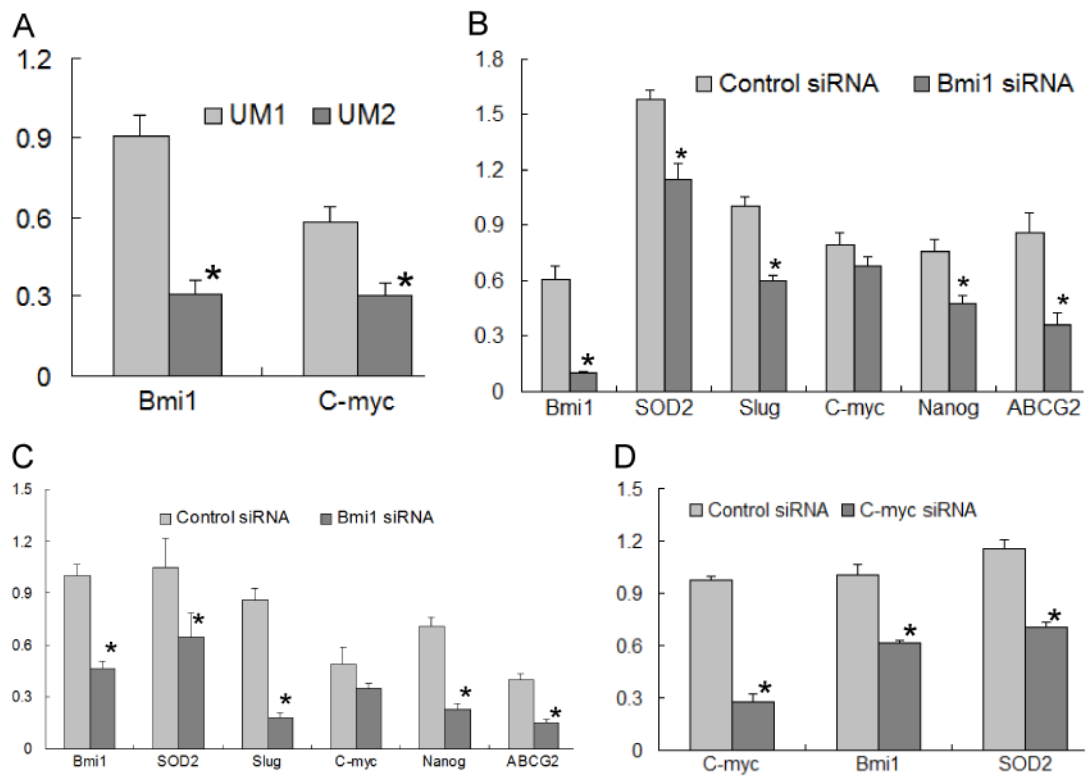

**Figure S2:** The results obtained from western blot (Figure 3-5) were quantified by Quantity One software.

**A:** The expression of Bmi1 and C-myc in UM1 and UM2 (quantified of Figure 3A). **B:** The expression of Bmi1, SOD2, Slug, and stem cell markers (ABCG2, Nanog) was significantly decreased in UM1 cells transfected with Bmi1 siRNA (quantified of Figure 3A, 3G). **C:** The expression of Bmi1, SOD2, Slug, and stem cell markers (ABCG2, Nanog) was significantly inhibited in SP cells transfected with Bmi1 siRNA (quantified of Figure 4A). **D:** The expression of C-myc, Bmi1, and SOD2 was significantly inhibited in SP cells transfected with C-myc siRNA (quantified of Figure 5E). \*:  $P < 0.05$ .

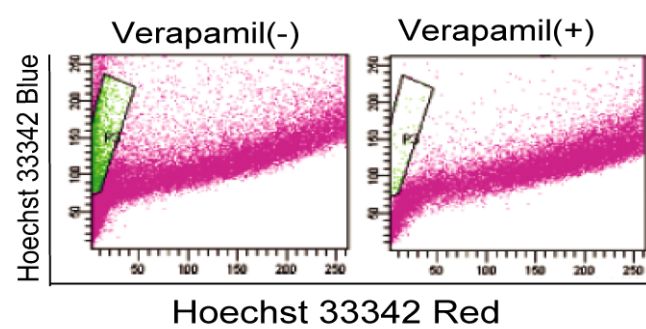

**Figure S3: SP cells are sorted by Hoechst 33342 staining and identified by verapamil.**

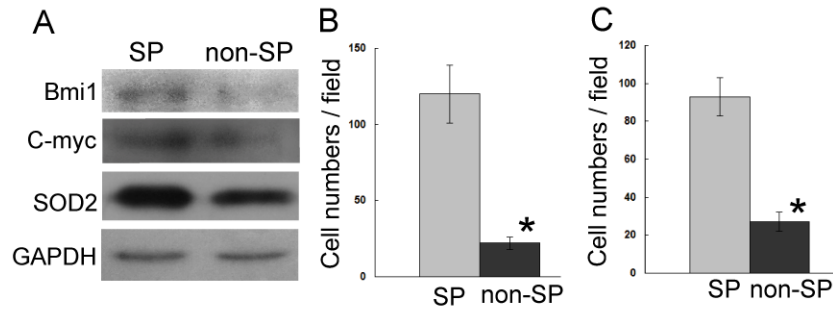

**Figure S4: SP cells demonstrate increased SOD2 expression and migration and invasion abilities in TSCC.**

(A) The expression of C-myc, Bmi1, and SOD2 was detected using western blotting, with GAPDH as a loading control. (B, C) The migration (B) and invasion (C) abilities were significantly higher for SP cells compared to non-SP cells. \*:  $P < 0.05$ .
